# Supplementary material
Source: MDPI journal article supplement (https://www.mdpi.com/1424-8247/15/7/825)
Supplement: s1 [file s1]

# **Dehydroisohispanolone as a promising NLRP3 inhibitor agent. Bioevaluation and Molecular Docking.**

Laura González-Cofrade<sup>1</sup>, Irene Cuadrado<sup>1</sup>, Angel Amesty<sup>2</sup>, Ana Estévez-Braun<sup>2,\*</sup>, Beatriz de las Heras<sup>1,\*</sup>, Sonsoles Hortelano<sup>3,\*</sup>

<sup>1</sup>Departamento de Farmacología, Farmacognosia y Botánica, Facultad de Farmacia, Universidad Complutense de Madrid (UCM), Plaza Ramón y Cajal s/n-28040, Madrid, Spain; lagonz11@ucm.es (L.G-C); icberrocal@ucm.es (I.C.); lasheras@ucm.es (B. de las H.).

<sup>2</sup>Departamento de Química Orgánica. Instituto Universitario de Bio-Organica Antonio González, Universidad de La Laguna, Avda. Astrofísico Francisco Sánchez Nº 2, 38206, La Laguna, Tenerife, Spain; aarnesty@ull.es (A.A.); aestebra@ull.es (A. E-B.)

<sup>3</sup>Unidad de Terapias Farmacológicas, Área de Genética Humana, Instituto de Investigación de Enfermedades Raras (IIER), Instituto de Salud Carlos III, Carretera de Majadahonda-Pozuelo Km 2-28220, Madrid, Spain; shortelano@isciii.es (S.H.)

## **Content**

Preparation of deshydroisohispanolone (DIH)

<sup>1</sup>H NMR (CDCl<sub>3</sub>) of deshydroisohispanolone

Figure S1

<sup>13</sup>C NMR (CDCl<sub>3</sub>) of deshydroisohispanolone

Figure S2

NLRP3 inflammasome inhibition by MCC950

Figure S3

Raw data of Western blots

Figure S4-S10

Primers used and their sequences

Table S1

Antibodies used in Western Blot analysis

Table S2

### Preparation of deshydroisohispanolone (DIH).

Deshydroisohispanolone was obtained from the natural diterpene hispanolone following the procedure described in reference [21]. Thus, to 3.0 g (9.45 mol) of hispanolone in 175 mL of EtOH were added 10 mL of concentrated HCl and the reaction mixture was heated under reflux for 18 h. Next, this was treated with 100 mL of H<sub>2</sub>O and extracted with CH<sub>2</sub>Cl<sub>2</sub> (3 x 30 mL). The organic phases were collected, dried over anhydrous MgSO<sub>4</sub>, filtered, and the solvent removed. The residue was purified by column chromatography with hexanes-EtOAc (95:5) to yield 0.14 g (1.0 %) of deshydroisohispanolone (DIH) and 1.3 g of deshydroisohispanolone (46%) as yellow oils.

DIH:  $[\alpha]_D^{20}$  -91 (*c* 0.9, CHCl<sub>3</sub>); IR (neat)  $\nu_{\max}$  3150, 2970, 2850, 1665, 1505, 1465, 1305, 1160, 1030, 995, 765 cm<sup>-1</sup>; <sup>1</sup>H NMR (CDCl<sub>3</sub>, 500 MHz)  $\delta$  7.26 (1H, bs, H-15), 7.11 (1H, bs, H-16), 6.18 (1H, s, H-14), 3.53 (1H, d, *J* = 14.8 Hz, H-6a), 3.25 (1H, d, *J* = 14.8 Hz, H-6b), 2.33 (2H, m, H-12), 1.86 (1H, dd, *J* = 13.7, 1.4 Hz, H-5), 1.59 (3H, m, H-2, H-1), 1.43 (1H, dd, *J* = 13.2, 1.4 Hz, H-3), 1.32 (1H, td, *J* = 13.4, 5.1 Hz, H-8), 1.19 (1H, td, *J* = 13.0, 5.1 Hz, H-8), 1.07 (3H, t, *J* = 7.7 Hz, H<sub>3</sub>-17), 0.99 (3H, s, H<sub>3</sub>-20), 0.98 (3H, s, H<sub>3</sub>-19), 0.91 (3H, s, H<sub>3</sub>-18); <sup>13</sup>C NMR (CDCl<sub>3</sub>, 100 MHz)  $\delta$  204.7 (C, C-9), 158.6 (C, C-11), 142.5 (CH, C-15), 139.1 (CH, C-16), 130.8 (C, C-7), 124.0 (C, C-13), 111.2 (CH, C-14), 48.4 (CH, C-5), 44.2 (C, C-10), 41.7 (CH<sub>2</sub>, C-3), 33.7 (CH<sub>2</sub>, C-1), 33.7 (C, C-4), 32.3 (CH<sub>3</sub>, C-19), 28.1 (CH<sub>2</sub>, C-6), 27.8 (CH<sub>2</sub>, C-12), 22.2 (CH<sub>3</sub>, C-20), 20.8 (CH<sub>2</sub>, C-8), 18.3 (CH<sub>2</sub>, C-2), 17.2 (CH<sub>3</sub>, C-18), 12.4 (CH<sub>3</sub>, C-17); EIMS *m/z* 300 ([M<sup>+</sup>], 100) 285 (8), 271 (11), 267 (10), 229 (15), 149 (32), 147 (30), 81 (54); HRESIMS *m/z* 323.1981 [M+Na]<sup>+</sup> (calcd for C<sub>20</sub>H<sub>28</sub>O<sub>2</sub>Na, 323.1987).

**Figure S1:**  $^1\text{H}$  NMR ( $\text{CDCl}_3$ , 500 MHz) of deshydroisohispanolone.

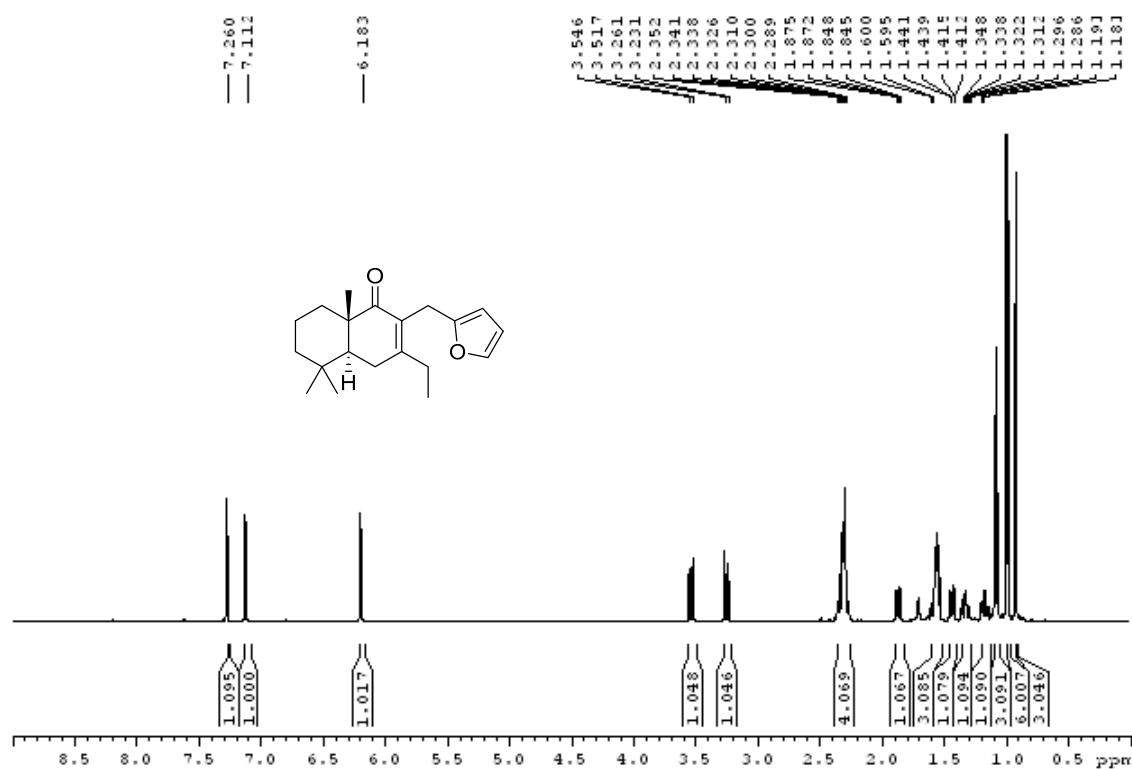

**Figure S2:**  $^{13}\text{C}$  NMR ( $\text{CDCl}_3$ , 100 MHz) of deshydroisohispanolone.

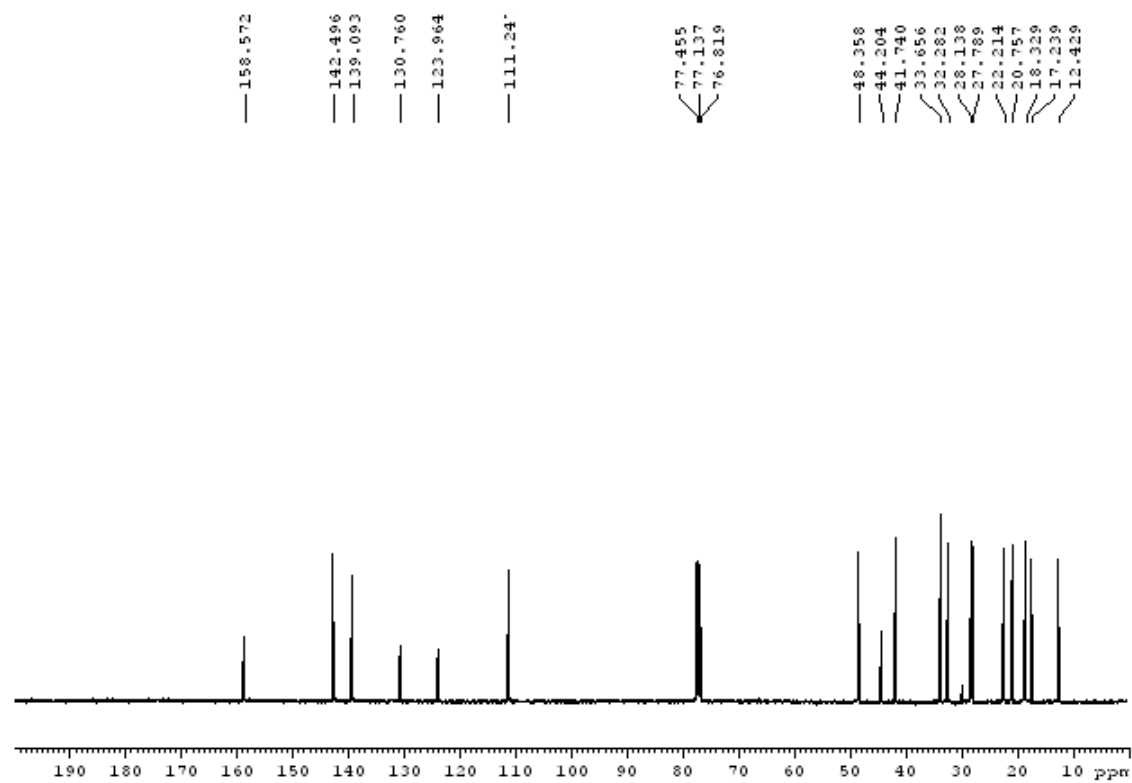

**Figure S3: NLRP3 inflammasome inhibition by MCC950.** MCC950 was used as a positive control for NLRP3 inflammasome inhibition. (A, B, C) LPS-primed J774A.1 macrophages were stimulated with Nig in presence of DIH (10, 20  $\mu$ M) or MCC950 (10  $\mu$ M) and IL-1 $\beta$  release (A), Caspase-1 activity (B) and LDH release (C) were then measured as described. (D) LPS-primed BMDMs were stimulated with Nig in presence of DIH (10, 20  $\mu$ M) or MCC950 (10  $\mu$ M) and IL-1 $\beta$  release was measured. Results are expressed as means  $\pm$  SD (n = 3). \*p < 0.05 and \*\*\*p < 0.001 vs. LPS + Nig treatment.

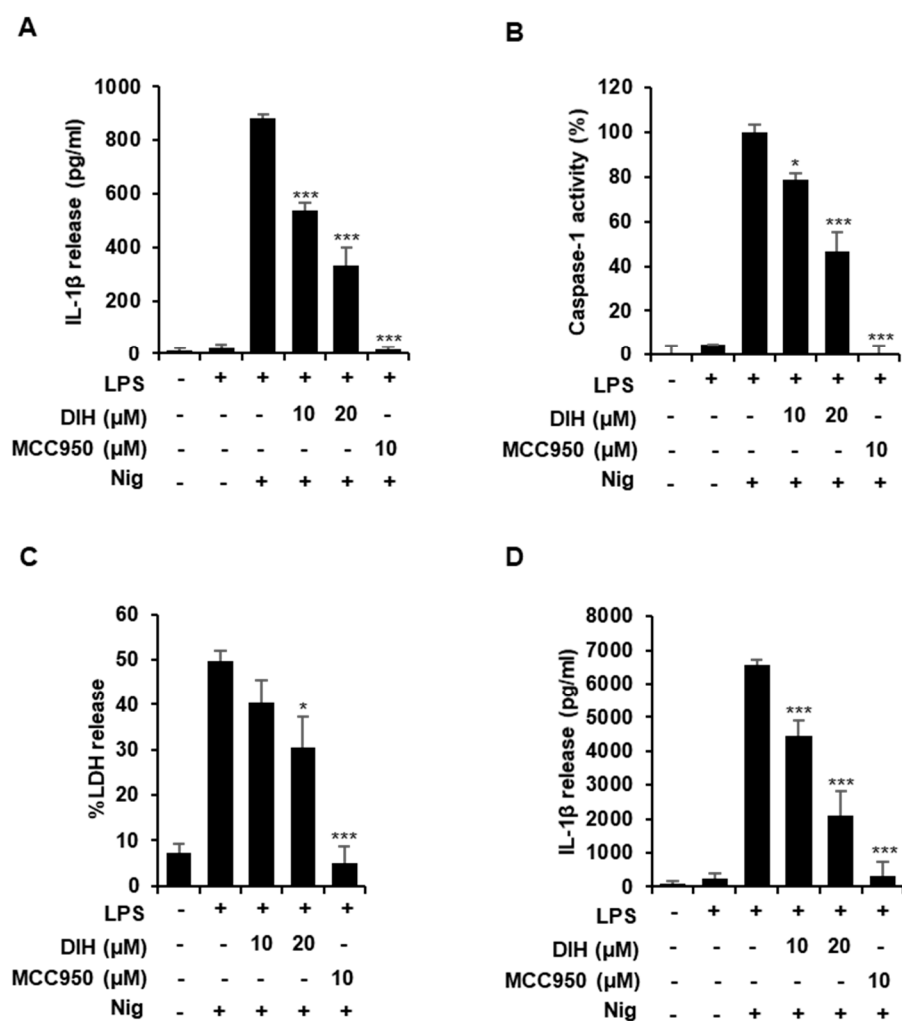

**Figure S4.** Original western blots for two repeats of Figure 2D. Whole blot of cell lysates after cutting membrane at molecular weight 35 kDa and 28 kDa for  $\beta$ -actin (42 kDa) and pro-IL-1 $\beta$  (31 kDa); and supernatants after cutting membrane at 28 kDa for cleaved IL-1 $\beta$  (17 kDa).

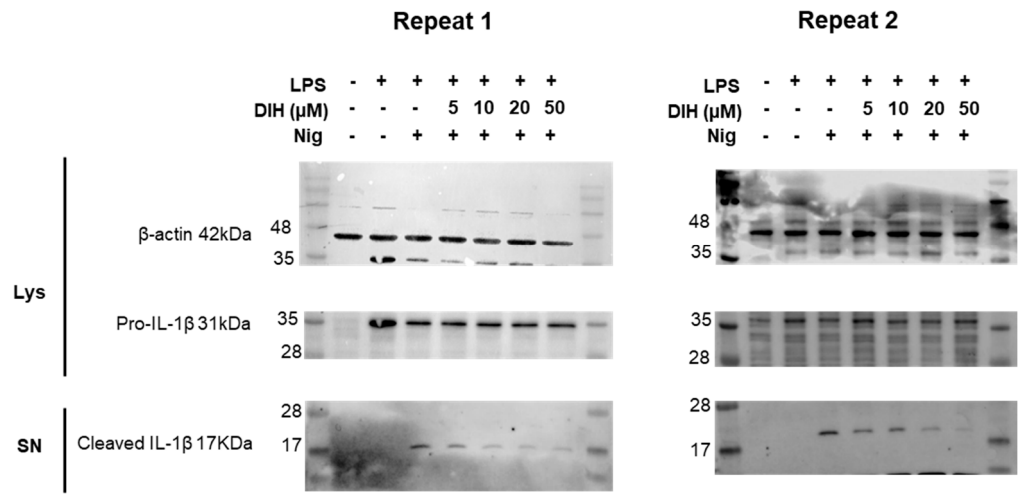

**Figure S5.** Original western blots for two repeats of Figure 2E. Whole blot of cell lysates after cutting membrane at molecular weight 35 kDa and 28 kDa for  $\beta$ -actin (42 kDa) and pro-IL-1 $\beta$  (31 kDa); and supernatants after cutting membrane at 28 kDa for cleaved IL-1 $\beta$  (17 kDa).

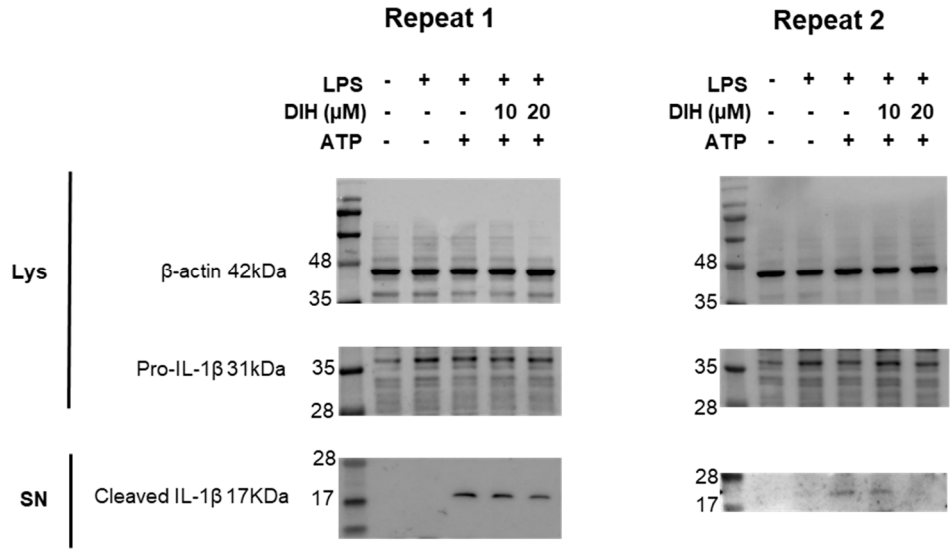

**Figure S6.** Original western blots for two repeats of Figure 2F. Whole blot of cell lysates after cutting membrane at molecular weight 35 kDa and 28 kDa for  $\beta$ -actin (42 kDa) and pro-IL-1 $\beta$  (31kDa); and supernatants after cutting membrane at 28 kDa for cleaved IL-1 $\beta$  (17 kDa).

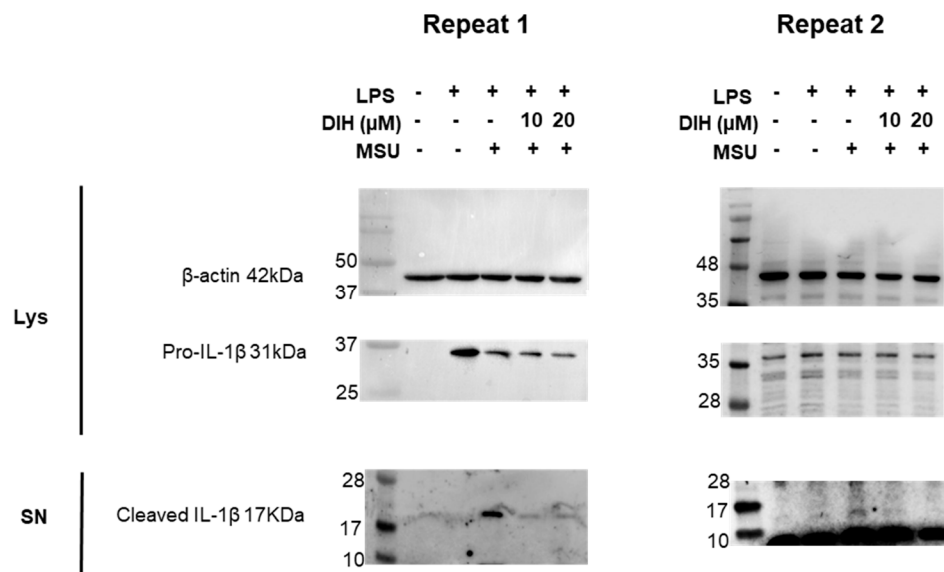

**Figure S7.** Original western blots for two repeats of Figure 3B. Whole blot of cell lysates after cutting membrane at molecular weight 48 kDa for pro-caspase-1 (45 kDa) and β-actin (42 kDa); and supernatants after cutting membrane at 10 kDa for caspase-1 p10 (10 kDa).

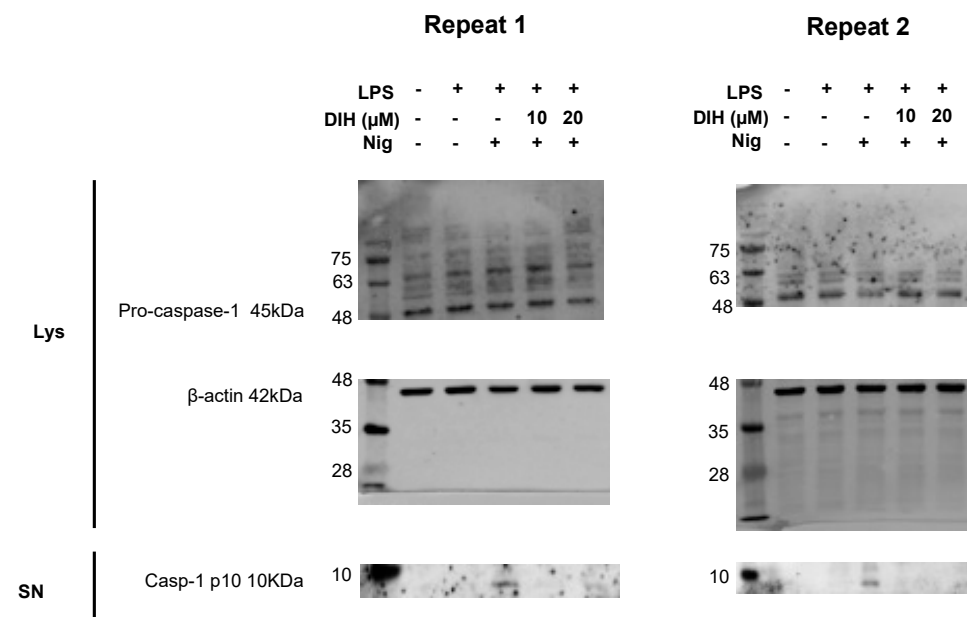

**Figura S8.** Original western blots for two repeats of Figure 4B. Whole blot of cell lysates after cutting membrane at molecular weight 48 kDa and 35 kDa for GSDMD (53 kDa), β-actin (42 kDa) and GSDMD-N (32 kDa).

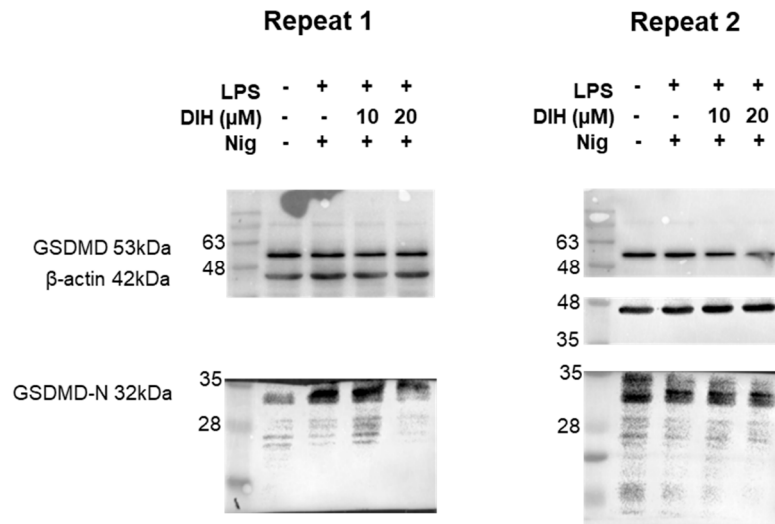

**Figure S9.** Original western blots for two repeats of Figure 5B. Whole blot of cell lysates after cutting membrane at molecular weight 63 kDa, 35 and 28 kDa for NLRP3 (103 kDa), β-actin (42 kDa) and ASC (24 kDa).

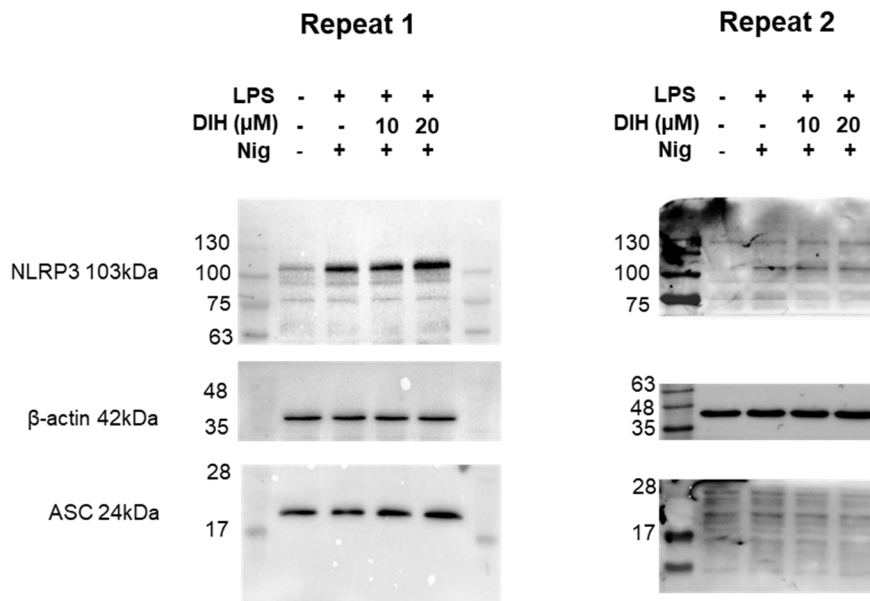

**Figure S10.** Original western blots for two repeats of Fig. 6B. Whole blot of cell lysates after cutting membrane at molecular weight 63 kDa, 48, 35 and 28 kDa for NLRP3 (103 kDa), pro-caspase-1 (45 kDa), β-actin (42 kDa), pro-IL-1β (31kDa) and ASC (24 kDa).

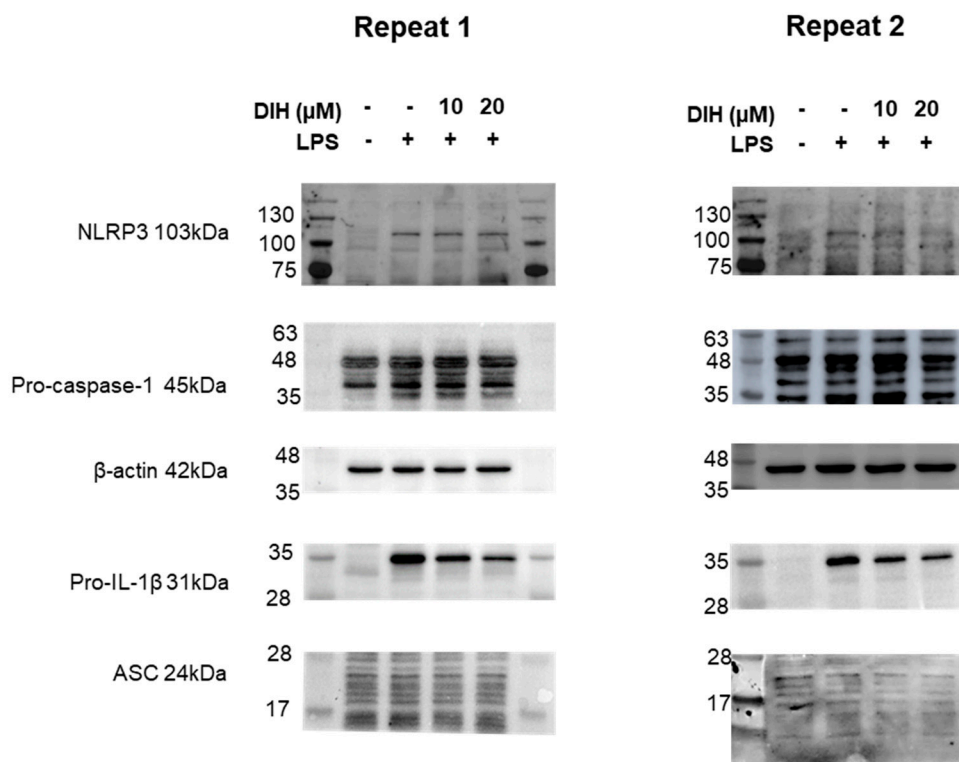

**Table S1.** Primers used and their sequences.

| Gene                 | Forward primer 5'-3'      | Reverse primer 5'-3'     |
|----------------------|---------------------------|--------------------------|
| <b>NOS-2</b>         | TCCACAGTATGTGAGGATCAAAAAC | ATGTGGCCTTGTGGTGAAGAGT   |
| <b>COX-2</b>         | GCTGTACAAGCAGTGGCAAAG     | GCGTTTGCGGTACTCATTGAGA   |
| <b>TNFα</b>          | CATCTTCTCAAAATTCGAGTGACAA | TGGGAGTAGACAAGGTACAACCC  |
| <b>IL-6</b>          | GAGGATACCACTCCCAACAGACC   | AAGTGCATCATCGTTGTTCATACA |
| <b>Pro-IL-1β</b>     | TCTTTGAAGTTGACGGACCC      | TGAGTGATACTGCCTGCC TG    |
| <b>NLRP3</b>         | AGCCTTCCAGGATCCTCTTC      | CTTGGGCAGCAGTTTCTTTC     |
| <b>IL-18</b>         | TGGTTCCATGCTTTCTGGACTCCT  | TTCCTGGGCCAAGAGGAAGTGATT |
| <b>Pro-caspase-1</b> | AGATGGCACATTTCCAGGAC      | GATCCTCCA GCAGCAACTTC    |
| <b>36B4</b>          | AGATGCAGCAGATCCGCAT       | GTTCTTGCCCATCAGCACC      |



**Table S2.** Antibodies used for Western Blot analysis.

| Antibody                                           | Source                    | Identifiers | Dilution |
|----------------------------------------------------|---------------------------|-------------|----------|
| Anti-mouse IL-1 $\beta$ (goat polyclonal)          | R&D systems               | AF-401-NA   | 1:500    |
| Anti-pro Caspase-1 + p10 + p12 (rabbit monoclonal) | Abcam                     | ab179515    | 1:1000   |
| Anti-NLRP3/NALP3 (Cryo-2) (mouse monoclonal)       | AdipoGen                  | AG-20B-0014 | 1:1000   |
| Anti-mouse ASC/TMS1 (D2W8U) (rabbit monoclonal)    | Cell Signaling Technology | 67824T      | 1:1000   |
| Anti- $\beta$ -actin (mouse monoclonal)            | Sigma                     | A5541       | 1:5000   |
| Anti-GSDMD (rabbit monoclonal)                     | Abcam                     | ab209845    | 1:1000   |
| Goat Anti-Rabbit IgG H&L (HRP)                     | Abcam                     | ab205718    | 1:10000  |
| Anti-goat IgG HRP                                  | R&D systems               | HAF017      | 1:1000   |
| Anti-mouse IgGk BP-HRP                             | Santa Cruz                | sc-516102   | 1:5000   |
